# Supplementary material
Source: PubMed Central journal article supplement (PMC1283540)
Supplement: nar_33_20_6461__1.pdf [file nar_33_20_6461__1.pdf]

## Supplemental Figure 1

### Binding of R2 amino (N)-terminal peptides to the DNA target site

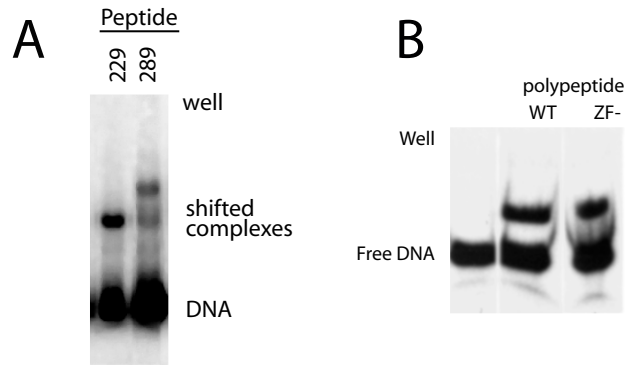

**(Panel A)** Electrophoretic mobility shift assays (EMSA) of the 229 and the 289 polypeptides bound to a 100 bp DNA sequence extending from 50 bp upstream to 50 bp downstream of the R2 target site in the 28S rRNA gene. The 289 peptide gave rise to two shifted bands. The less abundant lower band may correspond to the binding of a peptide, approximately 30 aa shorter than that of the full-length 289 product, observed to co-purify with the full-length peptide. Only the larger EMSA complex generated by the 289 polypeptide was foot-printed in Figure 2 of this study.

**(Panel B)** EMSA of the wild type (WT) and zinc finger mutant (ZF<sup>-</sup>) 229 N-terminal polypeptides. The same DNA target was used as that in panel A.
